# Supplementary material
Source: publisher figshare collection journal article supplement (https://springernature.figshare.com/ndownloader/files/14606336)
Supplement: Supplementary file 1 [file 14606336]

## Sheet: final
	Included in batch	biological replicate	Valid Object Count										Cell Viability										Reduced Mitochondrial Potential										Cell Membrane Damage										Nuclear size
Concentration			0.488281	0.976562	1.95312	3.90625	7.8125	15.625	31.25	62.5	125	250	0.488281	0.976562	1.95312	3.90625	7.8125	15.625	31.25	62.5	125	250	0.488281	0.976562	1.95312	3.90625	7.8125	15.625	31.25	62.5	125	250	0.488281	0.976562	1.95312	3.90625	7.8125	15.625	31.25	62.5	125	250	0.488281	0.976562	1.95312	3.90625	7.8125	15.625	31.25
PC -Valinomycin 900 nM	1	3	-8.48922	-7.59525	-7.85533	-7.38575	-7.20543	-7.89438	-7.32871	-8.35489	-8.53878	-8.43233	-10.4578	-10.3092	-10.241	-9.66952	-9.80492	-10.3389	-10.0787	-10.643	-10.5926	-10.338	-8.0426	-8.11477	-8.08057	-8.2912	-7.72268	-9.33933	-10.6381	-10.763	-11.4653	-9.33195	19.8797	22.6455	22.1887	20.3436	21.5322	23.2094	23.0908	22.8416	19.158	15.5817	4.33848	3.26964	4.04675	4.30912	4.07099	4.55774	2.22652
PC- CdCl2 100uM	2	3	-1.31107	-0.295907	-0.382281	-1.0936	-3.7514	-8.57751	-13.9577	-19.0344	-23.6852	-26.6909	-0.91754	-0.0769918	-0.207117	-1.11368	-4.41502	-9.78303	-14.5768	-18.951	-22.1372	-24.7267	-1.33169	-0.574451	-0.81307	-0.757014	-2.15353	-3.27494	-5.07675	-7.22039	-8.60268	-11.5431	-1.25836	-0.58306	-0.635048	0.199731	5.70087	13.1357	15.418	15.7927	14.6716	23.9356	1.00015	0.31388	-0.159758	0.851166	2.16589	4.85254	9.50922
PS-NH2	1	3	-0.222739	-0.336844	-0.65548	-1.09396	-1.15179	-4.43515	-6.11794	-8.43839	-15.1133	-27.5332	-0.651796	0.517271	-0.573838	-0.671349	-0.43867	-2.66502	-3.73438	-4.41416	-10.331	-25.7013	0.406271	-0.193186	0.334793	-0.110872	0.46265	0.0765914	-1.47388	-6.01933	-9.97108	-11.2466	0.245874	-0.766458	0.545979	0.0199444	-0.254892	-0.968113	3.25803	21.9652	55.8033	96.506	0.525694	0.476938	-0.446647	0.665295	0.736934	2.75463	1.91556
PS-NH2 50 nm	3	1	-1.65108	-0.69709	-1.95456	-1.84338	-2.38573	-4.08789	-3.4569	-3.37728	-12.7129	-37.1801	-1.50232	-1.78078	-1.91333	-2.05035	-2.19501	-3.53776	-3.26322	-4.0065	-14.0159	-36.1256	-0.161532	-0.280261	-0.891307	0.328916	0.540268	-0.114408	1.75973	-1.7081	-10.8063	-20.6679	-0.554724	6.58534	-0.189948	2.02706	-0.703564	-2.84686	-0.712541	6.86837	26.9202	82.3751	1.13683	0.549966	2.28016	0.0355041	0.874841	1.66916	0.662976
PS-COOH 100 nm	3	1	-0.725634	1.83587	-1.56995	-0.542348	-1.06366	-0.617465	-1.84939	-0.673052	1.93803	3.65071	-0.565314	1.7225	-1.36182	-0.406694	-0.922209	-0.355102	-1.7328	-0.690605	2.08509	3.99068	-0.822674	-0.293926	-1.09984	-0.510793	0.210157	-0.468173	-1.08424	-2.8849	1.82373	3.69977	-1.26443	-0.762155	-0.875084	-1.22946	-1.23655	-1.24695	-0.0529208	-0.524483	0.307602	-0.139862	0.216042	-2.44677	0.79223	-0.824021	0.541148	-0.946545	1.58284
Medium (w/ TA/SC) for AgS 5x	3	2	-1.64744	-0.336124	-0.73342	-0.55908	-1.11585	-1.14833	-1.69926	-0.593986	-1.33458	-1.3248	-1.71238	-0.357442	-0.519338	-0.634094	-1.06021	-1.22562	-1.55617	-0.748805	-1.4076	-1.33527	-0.0676494	-0.628905	0.0533354	-0.662209	1.0034	-0.640552	0.0220576	-0.458619	0.232354	0.433074	-0.00408893	-0.146721	-0.39253	-0.114724	0.19541	-0.330874	0.165508	0.954418	1.13122	0.436783	0.680196	-0.530474	0.0875112	0.0864363	0.374082	-0.0590559	-0.0616078
Medium (w/ TA/SC) for AgO, Ag NP, 5x	3	2	-2.50116	-1.15821	0.118276	-1.18108	-1.29027	-1.66559	-1.42348	-1.43679	-1.62244	-2.08247	-2.15831	-1.05333	-0.0371978	-1.23906	-1.12455	-1.37497	-1.26297	-1.18862	-1.18878	-1.65608	-1.77869	-1.21592	-1.10946	-0.84506	0.0756859	-1.21366	-0.602393	-0.47697	-0.0857761	-0.57882	-1.21063	-0.454981	-0.126287	0.780043	-1.14151	-1.90002	-0.458457	-0.59578	-0.121368	-2.58727	1.58624	0.424764	-1.20243	0.243797	0.684615	0.667014	0.879272
Ag (JRC NM-300K) pristine	1	3	-0.381348	0.0105091	-2.04331	-4.13399	-5.60242	-7.37529	-7.89892	-4.62764	-3.65524	-9.34275	-0.468927	-0.310437	-2.74169	-6.36163	-8.55478	-11.516	-11.8914	-6.58662	-4.02482	-10.9145	0.299977	0.79256	-0.402595	-1.72436	-1.71347	-2.73071	-2.2217	0.4948	2.8134	-4.22757	0.274856	1.3069	3.53471	12.5406	17.711	29.8769	29.0597	11.2491	3.51471	10.2858	-0.223087	0.200022	2.27645	2.97246	3.51679	3.68992	1.55139
AG (NM-300K-1152+AgPure_Ag2S_170915h) aged	2	3	1.47655	-1.37584	-1.81451	-1.10749	-0.124496	-2.93538	-10.2742	-13.1878	-16.8625	-19.8308	0.335014	-2.27519	-2.62859	-1.18309	-0.746558	-3.10256	-10.2971	-12.5642	-15.7105	-18.2127	3.77852	0.54325	2.3991	4.55906	10.2875	6.06427	-1.63207	-6.51779	-8.24347	-12.9205	2.01252	1.46597	1.12304	1.1401	2.28695	2.14744	9.01642	11.8942	3.25397	0.225803	-0.637525	1.13997	-0.0641043	1.58449	-0.312093	5.52416	14.1489
Ag (JRC NM-300K) dispersant	1	3	-0.176732	0.162955	-0.821722	-0.989993	-0.831904	-0.480233	-0.403679	-0.229544	-0.806818	-1.46794	-0.183564	-0.165248	-0.75912	-1.04169	-0.84586	-0.358728	-0.67457	-0.189722	-0.87341	-1.52359	-0.225462	0.275133	-0.132258	-0.39087	0.126211	1.35895	1.25875	1.43476	0.416823	0.601433	-0.308119	0.797559	-0.309931	-0.185939	-0.339709	-1.99939	0.0432009	0.28236	0.177179	0.159152	0.270164	0.175435	0.634275	0.519872	0.268984	0.625708	0.673589
AgPURE_15nm	2	3	0.251873	-1.63052	-2.13809	-0.763469	-1.20024	-0.739835	-8.47676	-7.53956	-13.7249	-10.2894	-0.330085	-2.46385	-3.05162	-1.38926	-1.71533	-1.02743	-8.7856	-8.16905	-14.2553	-11.1143	0.591272	0.670289	0.805527	0.624753	0.194427	0.236865	1.39378	0.75927	0.462599	2.67182	1.22711	1.3708	1.03801	1.63603	1.73263	2.1692	6.82345	11.4831	18.0114	20.7887	1.5296	0.791984	-0.531356	1.53531	0.838836	1.74249	6.93958
Ag_ME107a (PROM)	3	3	-0.976161	-0.474712	-0.670416	-0.803096	-4.05632	-7.33259	-12.8189	-11.9051	-11.9652	-31.9384	-1.17143	-0.562053	-0.948289	-1.51573	-7.03378	-10.1801	-15.1111	-13.4848	-12.0187	-28.6768	0.74306	0.168626	0.178047	0.587715	-0.354788	-1.3709	-2.37359	-3.68055	0.774857	-9.73877	0.607072	0.470109	1.50797	1.37597	10.7406	17.4915	26.9042	23.5965	11.2836	13.3843	0.861252	0.538009	0.427241	0.629882	-2.11916	-0.254956	7.13209
Ag2S 36 nm PVP	3	2	-1.48521	-1.61654	0.171143	-1.03684	-1.62536	-2.07767	-2.06816	-2.11198	-2.26936	-3.07581	-2.07821	-1.61439	-0.311625	-1.56313	-1.14568	-1.61132	-2.13814	-2.3227	-2.13901	-2.5087	-0.873041	-1.5764	-1.17215	-1.73282	-2.0513	-3.57861	-3.00738	-2.93417	-2.65664	-2.18466	-1.10967	-1.09668	-1.44504	-1.24599	-1.68479	-1.70407	-0.341835	-0.184947	-1.01019	-3.80926	1.51994	1.32795	-1.42952	0.234151	0.932907	2.34585	1.8249
Ag 50 nm TA/SC	3	2	-1.68387	-1.52314	-2.27087	-1.47732	-3.28174	-5.82495	-9.20623	-9.97846	-11.0593	-8.34098	-1.37534	-1.85592	-2.05255	-1.51392	-3.55854	-6.30857	-8.21773	-8.60472	-9.56884	-7.00804	-0.306572	-0.455724	0.209147	0.634227	0.903062	-0.695619	-1.75896	-3.92405	-7.06215	-11.415	-1.11624	-0.531842	-1.43569	-1.98159	-1.69903	-0.183021	-2.32449	-5.42341	-7.17243	-8.11067	1.18727	1.54886	1.73825	0.682869	3.10846	7.31768	9.75571
AgO 50 nm TA/SC	3	2	-1.86713	-0.491262	-1.27597	-1.77334	-2.80068	-5.78459	-10.0928	-10.6835	-10.7085	-7.60444	-1.39329	0.0110163	-0.542791	-0.963694	-2.26194	-5.04252	-10.419	-9.71356	-9.92364	-6.77614	-0.719942	0.338535	0.021453	-0.582656	0.0275755	-1.16792	-1.29419	-4.83279	-7.38231	-12.1097	-1.65347	-0.684974	-1.93886	-3.14866	-3.37684	-2.18079	-4.0578	-6.08746	-7.56214	-8.41873	1.15151	-0.254866	0.479675	0.863304	4.04042	6.74056	9.09684
Ag 2-3.5 um bulk (Sigma)	2	3	-0.70513	0.342924	-0.572884	-1.40938	0.0198188	-1.28989	-1.03377	-0.832347	-0.803968	-1.09809	-1.0841	-0.34517	-1.14233	-1.55526	-0.899129	-1.28838	-1.19238	-0.771362	-0.948358	-1.27691	1.25927	1.09988	0.570434	0.580623	1.12552	0.137017	0.563757	1.09316	1.24153	1.72962	1.34693	1.30814	1.35015	0.70162	1.91983	0.397265	1.00175	0.346412	0.944273	1.44485	0.803417	0.682018	-0.160603	1.30036	0.227835	2.24494	0.197841
CeO2 (JRC NM-212)	1	3	-0.975569	-0.827591	-0.851461	-1.51847	-0.509722	-0.346634	-0.738742	-0.423155	-0.803359	-1.21425	-1.09003	-0.820447	-0.806259	-1.52281	-0.530853	-0.438465	-1.093	-0.990817	-1.58263	-3.19335	-0.56782	-0.00812456	-0.599487	-1.06159	0.0342607	0.626177	2.21784	2.9609	3.06642	5.0128	-0.502968	-1.19113	-0.371157	-0.799935	0.0580286	-0.251939	2.00136	3.21995	5.98639	16.3429	0.485983	0.249104	1.0309	1.23977	0.0564401	0.197264	1.41056
CeO2-undoped (PROM)	1	3	0.09602	-0.228405	0.115587	-0.0376239	-0.0827682	0.235338	0.145297	-0.245309	0.0304388	0.202211	0.075071	-0.357704	0.169017	-0.0577219	-0.0455622	0.18639	0.0163187	-0.119518	-0.112565	-0.0457165	-0.0312581	0.264373	0.100056	-0.57137	0.501521	0.82339	0.402201	-0.130921	-0.74728	-1.17804	-0.863346	0.0683001	-0.0483608	-0.664948	0.312397	-1.09989	0.567953	-0.465468	0.514932	1.67421	0.260104	0.287345	0.0225532	0.235047	0.694528	0.733852	0.695921
CeO2-IKC1 (UoB)	2	3	-0.693713	-0.48079	0.380161	-0.255404	0.714346	-0.275537	-0.161479	-0.0234029	0.0433964	1.16212	-0.888238	-0.957047	-0.262102	-0.424894	0.419036	-0.587204	-0.399418	-0.226359	-0.360469	0.567161	0.429625	0.743469	0.858097	0.671886	0.278651	0.476209	0.770607	0.870527	1.48506	1.16777	0.754407	0.445051	0.857854	0.407495	0.635844	1.75616	0.999618	0.762055	1.13189	1.52242	0.969526	-0.540828	-1.78389	-1.00038	-0.737236	0.0742072	0.0797455
CeO2_IKC3 (UoB)	2	3	-0.869718	-0.299409	0.377974	0.188091	-0.481228	-0.149682	0.411481	-0.295558	0.359476	-9.74133	-1.21609	-0.54755	0.0566589	0.0410184	-0.519053	-0.370548	0.0553435	-0.275135	0.213125	-8.77063	0.60949	0.852236	0.672768	0.783459	-0.170309	0.538029	1.15737	0.749689	1.89198	-3.36843	0.818489	0.38291	0.548503	0.224928	0.437893	1.41295	1.10452	0.761704	0.625225	1.99577	-0.15274	-0.131696	-1.22249	-0.762027	-0.518694	-0.226363	-0.92858
CeO2_IKS1 (UoB)	2	3	-0.963591	-1.06602	-0.0937614	0.246174	0.110737	0.227956	0.00401726	-0.726143	1.15182	-0.822973	-1.01854	-1.21604	-0.403809	0.271878	0.0884945	-0.0361945	-0.147232	-0.75672	0.85463	-0.77574	0.239299	-0.0686327	0.361401	0.619756	0.215784	-0.153665	0.569577	0.233776	0.705998	-0.621115	0.202972	0.580495	0.121812	0.0863217	0.0508624	0.464245	0.649214	0.522757	0.95298	0.88064	0.409613	0.564626	-0.668921	0.313449	0.293783	0.81067	-0.403331
CeO2_IKS2(UoB)	2	3	-0.356918	0.32208	0.243945	1.14894	-0.214793	-1.05789	-0.00096096	-0.172765	0.807015	-1.36415	-0.520523	0.24262	-0.150956	0.98274	-0.185411	-1.44803	-0.0721362	-0.545342	0.826072	-1.38852	0.640121	0.341765	0.467933	0.558574	0.282494	-0.807879	0.309894	0.0433981	0.105946	-0.939045	0.690629	0.00404392	0.353664	-0.325418	0.0664157	1.15886	0.349222	1.56846	0.634029	0.384707	0.447614	-0.235485	-1.25614	-0.630187	0.209271	0.89354	1.40689
CeO2_IKS3 (UoB)	2	3	-0.0713212	0.527161	0.529771	0.473058	0.517931	0.0346013	-0.237687	-0.666023	0.236113	-1.7943	-0.41565	-0.469997	0.072491	-0.324138	0.165506	-0.867741	-0.263199	-0.903361	0.0629903	-1.72818	0.246729	0.472817	0.463133	0.669601	-0.253334	-0.213415	0.434724	1.11473	0.994347	-0.449398	0.570718	0.367524	-0.161873	1.19871	0.848933	1.43377	-0.140881	0.807621	1.01813	1.57637	0.68364	-0.535675	-1.46762	-0.781262	0.948729	0.245935	-0.210987
CeO2_IKR1_ (UoB)	2	3	0.810718	0.294077	-0.218717	0.380457	0.287424	-0.378577	-1.00594	-1.04854	-7.48279	-2.60416	0.158011	-0.708317	-0.830738	-0.465021	0.18677	-0.443912	-1.0943	-1.26363	-7.46378	-2.49355	0.784772	0.898865	0.124495	0.735099	0.213733	-0.0901205	1.07181	1.16394	1.86289	0.628586	0.156316	0.802093	0.684449	0.688039	0.654926	0.301748	0.546823	0.595075	3.90105	0.381474	0.354513	0.379986	-0.394113	-0.488887	0.783281	1.19378	0.612895
CeO2_IKS5_ (UoB)	2	3	-0.91217	-0.908586	-0.682595	-0.289095	-0.908754	-0.58513	-1.41511	-0.690635	-1.79496	-2.78848	-1.49796	-1.17931	-1.09221	-0.415946	-1.07955	-0.877576	-1.50812	-0.965739	-1.7301	-2.8289	0.953885	0.926405	0.955386	1.02392	1.00663	0.914568	1.51595	1.81994	1.75575	-0.372626	1.46529	0.319882	0.711858	0.569759	0.631607	1.24041	0.584591	1.4882	1.13309	2.106	1.59288	1.28201	-0.641481	0.25218	1.89005	1.52396	1.48102
CeO2_IKC4_ (UoB)	2	3	1.4644	0.0792952	0.99998	0.0676634	-0.655688	-1.49648	-0.993867	-0.878978	-0.0762124	-3.11284	1.41896	-0.101928	0.61704	0.165732	-0.667514	-1.61883	-1.0873	-0.836077	-0.27586	-3.46171	1.56615	0.5197	1.51426	0.677096	-0.00548356	0.540057	0.500574	0.559546	1.56623	-0.0687761	-0.235621	0.040433	0.493613	0.343426	0.391251	1.73819	0.362868	0.191002	1.20451	3.85585	0.0915516	0.433827	-2.79717	-0.607688	1.32399	0.830823	1.02508
CeO2_IKS6_ (UoB)	2	3	0.990642	-0.248844	-0.703502	0.506757	-0.0443317	-0.00821353	-0.473796	-0.0551318	-0.297964	-1.05561	0.872887	-0.864918	-0.983401	0.409739	-0.218715	-0.509832	-0.619992	0.0311864	-0.516381	-1.27814	1.22583	0.293316	0.210658	0.235742	-0.173743	0.251222	0.715585	1.37448	1.54411	1.12297	-0.168766	0.982718	0.263946	-0.0697331	0.337818	1.43735	0.346324	-0.287152	1.17486	2.08557	-0.56829	0.0338578	-1.39475	-0.286566	0.0930455	0.472859	-0.140762
CeO2_IKS7_ (UoB)	2	3	1.84452	0.0719909	1.49346	-1.12749	-0.794522	-1.80354	-0.931741	-2.09379	-2.99869	-4.60875	1.72005	-0.244091	1.00571	-1.07465	-1.24415	-1.84797	-1.07986	-2.10176	-2.91613	-4.63549	-0.00965543	-0.169217	0.18369	-0.784445	0.232733	-0.519786	0.000903299	0.245098	-0.148674	-1.40418	-0.550203	0.0776869	0.249629	-0.33265	1.94971	0.757458	0.190934	0.804223	0.81438	3.74805	-0.0737581	-0.0727905	-2.17167	0.198981	0.209945	2.33643	0.320044
CeO2_CeO210 (UoB)	2	3	-1.49674	-0.143757	0.206293	-0.290175	-1.15801	-1.18717	-1.6268	-1.91676	-1.75447	-2.59647	-1.46404	-0.38882	-0.165401	-0.349517	-1.4148	-1.77855	-1.69861	-1.84483	-1.72828	-2.78977	-0.710555	-0.211528	-0.578222	0.444483	0.0270003	-0.13036	-0.254176	-0.170524	-0.643035	-1.38465	0.187723	0.27169	0.160503	-0.307401	1.92362	2.24165	0.624178	1.20039	0.325291	3.62346	0.432418	-0.884666	-0.454152	-0.317044	0.876318	1.57323	0.635252
CeO2_CeO240 (UoB)	2	3	0.479861	-0.344745	-0.609018	-0.531999	-0.12488	-0.722115	-0.582734	-0.382593	-0.904965	-4.90707	0.298976	-0.718296	-1.08423	-0.594174	-0.499318	-0.809939	-0.739966	-0.626201	-1.07877	-4.91558	1.12123	0.354141	0.278017	0.360738	0.0666104	-0.164387	0.387832	0.363382	0.599203	-1.56948	0.32928	0.975151	0.610606	0.471252	1.28306	0.934363	0.597931	1.40434	1.51476	2.16007	-1.943	0.996731	-1.51755	1.02734	-0.0759624	0.684109	-0.23426
CeO2_CeO2360 (UoB)	2	3	-0.690903	-0.449769	0.137082	-0.479055	0.581935	-1.01145	-0.616185	-0.168267	-1.37608	-2.77603	-0.852845	-0.742624	-0.308283	-0.645456	0.439029	-1.19504	-0.630591	-0.360167	-1.59214	-2.81415	0.437797	0.517317	0.539988	0.261214	-0.658877	-0.0495512	0.299112	0.537856	0.978118	-0.166658	0.225725	0.140448	0.484283	0.217979	0.168773	0.960909	-0.330793	1.2786	1.45826	1.96673	1.09608	-0.812165	-1.01127	-0.200338	0.435944	0.859957	-0.120307
CeO2_A_CeO2 aged (PROM)	3	3	-0.510626	-0.277033	0.0374425	-0.849916	-0.333408	-0.967044	-1.1793	-2.0201	-1.86244	-2.59352	-0.766405	-0.255925	0.0678828	-0.834549	-0.400623	-0.992432	-1.31614	-1.99146	-1.95868	-3.28291	0.596383	0.45284	0.369127	-0.177314	1.01191	-0.328603	0.0407857	0.491063	0.579076	0.230468	0.67452	0.105825	-0.0387471	0.0959414	0.0778997	-0.0550707	0.757271	1.23726	2.38528	5.10725	0.334808	0.0611091	-0.816841	0.361512	-0.128414	0.446526	-0.672855
CeO2_B_Ce0.9Zr0.1O2 pristine (PROM)	2	3	-2.07884	-1.15227	-1.04895	-0.548275	-0.606504	-0.0747199	-1.08067	-0.316351	-1.04416	-0.375498	-2.44077	-1.81162	-1.59357	-0.40476	-0.974702	-0.24865	-1.16068	-0.568639	-1.31072	-0.694887	0.209673	0.635422	0.85138	0.312996	0.0822781	0.00970931	0.343788	0.612377	0.996741	-0.644336	1.08802	0.992903	0.526747	-0.565565	0.463362	0.390062	0.158168	1.22475	1.00247	1.52371	1.52393	0.815386	-1.43282	1.13446	0.582545	0.621226	0.399008
CeO2_B_Ce0.9Zr0.1O2 aged (PROM)	3	3	-1.09409	-0.694231	-1.40954	-1.1435	-1.17871	-1.01342	-0.75238	-0.177458	-1.6203	-1.70505	-0.915097	-0.386475	-1.18212	-1.00453	-0.98088	-0.875243	-0.780212	-0.811845	-1.80441	-2.12609	-1.44452	-1.14669	-1.04996	-1.53353	-1.3004	-1.46881	-0.950243	-0.768104	-1.06454	-1.93618	-0.839861	-0.987283	-0.561715	-0.578901	-0.975597	-0.868558	0.245173	1.67674	1.63775	2.59641	0.259326	0.249094	0.691466	0.602731	0.785007	0.739189	-0.0494934
CeO2_C_Ce0.75Zr0.25O2 pristine (PROM)	2	3	-1.83329	-1.0068	-1.0779	-0.588709	-0.199471	-1.45982	-1.20237	-0.660221	-1.37248	-1.27667	-1.97493	-1.27218	-1.08533	-0.635876	-0.499737	-1.59796	-1.30943	-0.743177	-1.58886	-1.50686	-0.173658	-0.560116	-0.406199	-0.236386	-0.289026	-0.726445	-0.144304	-0.0923727	-0.618372	-1.7252	0.179406	-0.183014	-0.654186	-0.355255	0.846493	1.22022	0.414872	1.06556	0.681463	1.42858	0.787508	-1.15694	-0.712031	-0.353335	0.843528	0.813906	0.318702
CeO2_C_Ce0.75Zr0.25O2 aged (PROM)	3	3	-1.59487	-1.09014	-1.24851	-1.42464	-1.42837	-1.50782	-1.23764	-0.975766	-1.68416	-2.45591	-1.578	-1.11094	-1.32296	-1.35397	-1.29203	-1.40593	-1.54321	-1.18408	-1.69229	-2.51787	-2.01894	-0.936667	-1.00811	-1.81515	-1.50262	-1.20638	-0.654758	-0.957505	-0.540166	-2.3941	-0.579866	0.298661	0.0582162	-0.357345	-0.660723	-0.343474	1.01432	0.698774	1.42266	1.54963	1.0033	0.886111	0.522858	0.439392	0.549955	1.1438	0.403748
CeO2_D_Ce0.48Zr0.52O2 pristine (PROM)	2	3	-1.57882	-0.775073	-1.49827	-1.05421	-1.10285	-0.64809	-1.71135	-1.42648	-0.973406	-1.91088	-1.42251	-0.857293	-1.36682	-1.12199	-1.32143	-0.619298	-1.46737	-1.31221	-0.913878	-1.81043	-1.06577	-0.853122	-1.52532	-0.643694	-0.608427	-0.302954	-1.03829	-1.03431	-0.693722	-1.73785	-0.539829	-0.152468	-1.29337	0.0326029	1.24821	0.103562	-0.267421	0.530284	0.676167	-0.000682451	0.666744	-1.18483	-1.14653	-0.534131	-0.67773	1.39594	0.721262
CeO2_D_Ce0.48Zr0.52O2 aged (PROM)	3	3	-1.66881	-0.224188	-1.46774	-0.89792	-1.11793	-1.72137	-1.68593	-0.771742	-2.67001	-2.245	-1.59787	-0.406642	-1.61109	-1.07621	-1.03931	-2.00467	-1.80055	-1.52933	-2.70875	-2.50225	-1.82077	-1.66232	-1.33994	-1.24441	-1.76327	-1.9459	-1.56248	-1.31732	-1.50684	-2.22476	-2.33211	-1.3302	-0.814002	-0.592994	-1.5499	-0.540995	-0.33997	0.610936	1.06573	1.37375	1.20727	0.290056	1.02807	0.52635	0.504176	2.09388	1.82845
CeO2_E_Ce0.25Zr0.75O2 pristine (PROM)	2	3	-1.48615	-2.2283	-0.578142	-1.03878	0.37388	-0.320841	-0.54366	-0.233084	-3.43626	-1.03644	-1.62115	-2.82302	-0.824217	-1.12273	-0.138844	-0.480052	-0.59537	-0.244885	-3.26102	-1.08131	-0.970089	-1.97363	-1.38429	-1.2399	0.20073	-0.708267	-1.02236	-0.991491	-1.43408	-1.94988	0.200045	0.105522	-0.498465	-0.601123	1.38885	0.373543	1.18953	0.280054	0.290397	1.47419	1.63974	-1.79016	-0.50144	0.499843	0.528882	1.27721	1.09495
CeO2_E_Ce0.25Zr0.75O2 aged (PROM)	3	3	-0.895716	-0.0160685	-1.41281	-1.03491	-1.21169	-2.34792	-1.71393	-0.414543	-3.09141	-2.00628	-0.855527	-0.098921	-1.27581	-0.861464	-1.29376	-2.0836	-1.25201	-0.608134	-2.71523	-1.75039	-1.21573	-0.962084	0.0971835	-0.842162	-1.01085	-1.13433	-1.24665	-1.06142	-1.27407	-1.56473	-2.00115	-1.13163	-0.903844	-0.49098	-0.861651	-1.67183	-1.41938	0.104808	0.180213	1.35052	0.448796	-0.113009	1.00521	0.296767	1.16689	2.51863	1.62157
CeO2_F_Ce0.1Zr0.9O2 pristine (PROM)	2	3	-0.0290384	-1.116	-1.09013	-1.52763	-1.28399	-2.25949	-1.48472	-3.04607	-1.24511	-2.65657	-0.095326	-1.34579	-1.19984	-1.40744	-1.67331	-2.12043	-1.39614	-2.77128	-1.3383	-2.42974	-0.0496799	-0.477232	-0.524623	-0.836432	0.170379	-1.0408	-0.539073	-0.606253	-0.309735	-2.48368	-0.437825	0.238726	-0.553906	-0.683959	1.49019	1.21783	0.518984	0.850278	1.04757	-0.0539983	1.02013	1.20005	-0.323244	0.255477	0.551306	1.56409	0.252236
CeO2_F_Ce0.1Zr0.9O2 aged (PROM)	3	3	-0.842542	-0.936575	-1.52434	-0.881782	-1.14648	-0.956166	-1.41598	-0.662996	-1.72591	-2.62058	-1.18968	-0.706327	-1.78976	-0.974622	-0.862075	-1.02228	-1.20932	-0.8778	-2.21487	-3.37338	0.829705	0.350434	0.426839	0.710503	0.358018	0.0606866	0.378799	0.689752	1.10428	-0.977908	1.33557	0.0774163	1.30003	0.461456	-0.0707958	0.139871	0.282173	1.10187	2.93731	5.3579	1.1147	0.728849	1.70444	0.656269	1.09766	1.16283	1.19382
ZrCeO2_MILE011-G-a pristine (PROM)	2	3	-1.00186	-0.124709	-1.14383	-1.23641	-1.21129	-0.212923	-0.734855	-2.69642	-0.454972	-1.23574	-1.18564	-0.0908178	-1.4627	-1.16932	-1.10914	-0.247459	-0.574381	-2.46118	-0.501298	-1.25575	-0.475162	-0.20512	-0.488579	0.0430482	-0.806475	-0.521829	0.0415927	0.194596	0.476818	-0.990819	0.146554	-0.584508	0.336979	0.025151	-0.0327179	0.676538	0.529034	0.170261	1.04516	0.454584	1.62593	-0.163143	-0.960923	0.783817	1.81167	1.21082	1.41656
CeO2_PO43 aged_21days (PROM)	2	3	-1.4225	-0.701376	-0.900605	-1.47444	-0.784471	-0.940653	-1.19021	-1.02542	-1.84689	-3.3283	-1.6408	-0.924364	-1.35933	-1.50577	-1.02536	-0.841644	-1.12815	-1.10798	-1.73228	-3.63756	-0.863311	-1.60112	-1.12017	-1.57727	-0.33449	-0.820878	-0.384825	0.0233704	-0.236178	-1.07285	0.422914	-0.252813	0.231352	0.10467	0.744079	0.287895	0.00852123	0.653678	1.16324	5.34879	0.537883	-1.15466	-1.16974	-0.124934	1.1487	1.55563	-0.385522
CeO2 5 um bulk (Sigma)	2	3	0.66978	-1.64812	-1.2642	-0.0582561	-0.610425	-0.701756	-0.42522	-0.88947	-0.48447	-2.28525	0.613908	-1.46766	-1.12359	0.0390938	-0.672752	-0.627937	-0.311617	-0.805327	-0.709262	-2.51662	0.0828763	-0.138709	-0.528939	0.268407	-0.0500204	-0.105662	0.341293	0.928347	1.83894	3.16314	-0.158163	-0.0443022	0.270627	-0.312123	0.831807	0.824687	-0.198332	0.980068	1.80864	2.82596	0.0949096	-0.182756	-0.865998	0.392108	0.377159	0.122132	0.831596
TiO2 uncoated (PROM)	1	3	-0.303721	-0.18718	-1.07843	0.0690887	-0.59653	-1.07722	-2.84008	-6.47865	-11.0735	-14.2409	-0.398095	-0.448947	-1.06123	-0.045297	-0.969734	-1.58746	-4.42144	-10.4342	-16.0233	-18.4413	-0.326081	-0.28195	-0.234723	-0.30162	-0.161428	-0.367315	-1.92757	-3.17233	-6.55142	-5.53513	0.0748386	-0.220587	-0.956623	0.345889	1.97528	2.67533	14.8356	38.823	55.6536	53.8485	0.0202708	0.22382	1.59258	0.625918	1.80928	2.7198	1.98684
TiO2-PVP pristine (PROM)	1	3	-0.212638	-0.171449	-0.766953	-0.772268	-0.481235	-1.03254	-2.03031	-4.59905	-6.96075	-11.5225	-0.287905	-0.248998	-0.7212	-0.834201	-0.747827	-1.20699	-2.82894	-6.16811	-10.5	-15.8281	-0.00248744	-0.39544	-0.651663	-0.380776	-0.295302	0.14713	-1.92362	-2.30668	-4.74979	-4.1017	-0.222534	-0.717832	-0.0551775	-0.829226	1.37919	0.863685	5.77689	18.8819	37.137	52.6298	-0.0518671	-0.359633	0.812922	0.989067	2.03466	2.36947	2.8896
TiO2-PVP_MILE005d_1000hQUV aged (PROM)	2	3	-0.61283	-0.413657	-1.67514	-1.27299	-0.367859	0.168021	-0.443084	-0.434666	-2.72478	-1.01699	-0.953653	-0.877152	-1.92141	-1.2926	-0.766531	-0.0063305	-0.343728	-0.47423	-2.81	-1.09576	-0.254071	-0.808131	-1.47801	-0.986388	-0.574228	0.0703081	-0.351959	-0.665303	-0.18047	0.539575	0.904841	0.00859493	0.205837	-0.0855912	0.994548	0.456473	-0.304269	0.317251	0.996865	0.86386	1.21901	-0.69323	-0.997377	-0.68843	0.326567	0.624599	0.731724
PVP10K coating (PROM)	3	3	-1.12249	-1.13886	-1.09347	-0.899544	-0.891908	-0.665994	-1.1968	-0.505155	-1.7372	-0.982349	-0.825965	-0.928688	-0.705246	-0.605704	-0.498474	-0.324019	-0.950118	-0.348474	-1.31284	-0.833087	-2.03664	-1.12986	-0.935185	-1.12925	-1.17462	-0.906163	-1.24839	-1.35778	-2.60508	-1.79995	-1.51224	-0.937717	-1.02175	-0.854614	-1.46195	-0.971657	-0.444443	0.398305	-0.65656	-1.0087	0.598563	0.784101	0.707533	0.329542	0.79287	0.649117	0.827607
TiO2-F127 (PROM)	1	3	-0.826656	-1.29865	-1.18144	-0.653069	-0.928272	-1.90641	-3.64086	-12.3703	-14.2751	-15.3669	-0.824783	-1.47074	-1.11176	-0.944996	-1.61058	-3.26354	-6.08488	-16.4877	-18.7942	-19.3638	-0.374028	-0.786526	-0.593664	-0.51241	-0.387974	-1.05571	-3.39437	-5.4144	-8.0487	-6.78336	0.0102024	0.0301551	-0.250431	1.42309	5.63595	7.97308	21.9678	51.4007	66.0012	58.9948	0.103571	0.725022	1.36272	1.24006	2.27176	3.57382	0.840512
F127 coating (PROM)	3	3	-1.84557	-1.29491	-0.379151	-0.583388	-1.32211	-1.32332	-1.34991	-0.894022	-2.66716	-1.40632	-1.82929	-1.06413	-0.370815	-0.47167	-1.23703	-1.20311	-1.27234	-1.04835	-2.32091	-1.4184	-1.40186	-1.14267	-0.986309	-0.645745	-1.00881	-1.24876	-0.353247	-0.497996	-0.5539	-2.01318	-0.69044	-0.446358	-0.325273	-0.658103	-0.596969	-0.219681	0.200306	0.84475	0.453355	0.186039	1.29329	0.68023	-0.47026	-0.0475031	0.554145	1.16752	1.11181
TiO2 AA4040 (PROM)	1	3	-0.625812	-1.20818	-1.37829	-0.469729	-1.00892	-1.07834	-1.80659	-4.64024	-8.5295	-13.4088	-0.639953	-1.44901	-1.34128	-0.702716	-1.43175	-1.58355	-3.48388	-8.64569	-14.1447	-17.8669	-0.775292	-1.10713	-1.45257	-1.18854	-0.62017	-0.422272	-2.11476	-3.79574	-5.35438	-5.10285	-0.539171	-0.963217	-1.15055	0.0412385	1.66295	3.7854	14.1439	38.9205	54.4405	53.2353	0.339343	0.920231	1.73102	1.23603	2.585	1.96179	1.75194
AA4040 coating (PROM)	3	3	-1.28127	-1.09457	-0.783526	-1.301	-0.845829	-2.18565	-1.45103	-0.760839	-2.31577	-2.12082	-1.51945	-1.1138	-0.933589	-1.21824	-0.629161	-1.90297	-1.17395	-0.603857	-1.8573	-1.58566	-1.03396	-0.722113	-0.562287	-0.9105	-0.319228	-0.915764	-0.619361	-0.0822876	-0.164193	-0.159464	0.10929	-0.0228522	0.384041	-0.590069	-1.24309	-0.929153	-0.815277	-1.33353	-1.48337	-1.8703	1.24126	0.572323	0.241354	0.18359	-0.0923725	1.32673	-0.158009
TiO2 (JRC NM-103)	1	3	-1.06518	-1.09183	-1.0669	-1.33066	-0.379773	-0.898634	-0.789531	-0.858932	-1.88636	-2.83066	-1.13346	-1.21806	-1.08338	-1.47689	-0.376092	-0.847215	-1.25008	-0.895674	-2.40003	-5.12242	-1.26043	-1.04083	-1.10004	-1.34827	-0.178729	-0.42262	0.3097	1.13404	1.23131	2.69513	-0.774314	-1.04442	-0.642282	-0.539958	-0.160527	-0.641643	2.79734	1.72809	3.32272	20.7804	-0.369484	-0.131715	0.0392325	0.348958	0.506399	0.823897	1.45917
TiO2 (JRC NM-104)	1	3	-0.82068	-0.990382	-0.991449	-0.506815	-0.27345	-1.26431	-0.592656	-0.490107	-0.818152	-1.35456	-0.928299	-1.13721	-1.1039	-0.618315	-0.209626	-1.20014	-0.921122	-0.536194	-1.25477	-2.19433	-1.20128	-1.02203	-0.796787	-1.24488	-0.507251	-0.802408	-0.308917	0.99364	1.37172	3.74089	-1.15779	-0.732807	-0.727088	-0.983722	-0.282685	-1.6432	1.63638	1.75595	3.51544	8.93276	0.330085	0.545688	1.21247	0.471247	0.783065	0.636234	1.2686
TiO2D540 10 nm (PROM)	2	3	0.0634301	-0.489862	-1.53085	-1.33142	-2.03754	-3.14753	-3.74308	-4.61232	-5.04888	-5.93343	0.156564	-0.513179	-1.49891	-1.02643	-1.60856	-2.69149	-3.36744	-4.50773	-5.37353	-6.11107	-1.40241	-1.7347	-2.1919	-2.41935	-3.68136	-2.47532	-2.56635	-2.38966	-2.68973	-4.81904	-1.65867	-1.84098	-1.13569	-1.5331	-1.57221	0.0633331	-0.155779	1.94952	4.32818	6.21349	1.01757	0.889046	-0.000763806	1.94191	2.6345	0.858966	0.274133
TiO2 Jrm/898 bulk (Nist)	2	3	-0.923744	0.113377	-0.96356	-1.10263	-1.1654	-0.0792083	-1.73615	-1.20219	-2.0212	-3.47476	-0.995557	0.0894148	-0.898219	-0.922913	-1.27336	0.0153585	-1.75155	-1.21101	-2.20599	-4.38254	-0.682327	-0.319122	-0.476874	-0.909788	-0.0928675	-0.130938	0.314835	0.673406	1.53954	1.99788	0.214133	-0.0443972	-0.44911	-0.2383	1.17761	0.278234	0.649643	0.814083	1.78026	8.92829	0.572971	0.190759	0.190387	0.150313	0.920866	0.733988	1.13543
TiO2 5 um bulk (Sigma)	2	3	-1.42081	0.564095	-1.10247	0.183665	-0.865671	-1.02407	-0.91828	-1.85573	-0.36914	-2.17951	-2.12562	0.38232	-1.5017	0.309935	-1.06867	-0.938808	-1.08155	-1.9298	-0.884803	-3.38717	0.402571	0.821224	0.464495	0.288391	0.521112	-0.334212	0.294532	0.963981	2.75547	3.55498	1.46289	0.182332	0.781963	-0.208802	1.2015	0.195984	0.862246	1.07371	2.65775	6.82832	2.24839	0.824421	-1.15783	-0.0884274	0.904609	2.07197	0.426128
TiO2 4-8 nm uncoated	3	2	-0.985107	-0.726906	-1.21429	0.190144	-0.362696	-1.37546	0.0266229	-1.9204	-2.66495	-2.65168	-1.10799	-0.685361	-0.98829	0.0806392	-0.466267	-1.33416	-0.0998909	-2.04498	-2.48351	-2.69164	0.479046	0.198263	0.564988	0.62062	0.333837	-0.451538	0.513377	-0.109688	-0.290814	-1.21702	-0.173492	0.305283	-0.0240108	0.256143	0.380226	-0.441381	0.0494902	1.24211	0.779981	0.302766	0.314063	-0.0665959	0.10156	-1.78468	-0.0929348	0.0572257	-1.54484
ZnO-uncoated (JRC NM-110)	2	3	-0.123913	0.168119	-0.997948	-0.297835	-0.557279	0.38502	-8.52361	-11.5057	-21.1807	-24.2538	-0.353104	-0.143323	-1.05841	-0.0997065	-0.632721	0.518788	-8.41914	-11.7513	-20.9057	-22.8299	1.92391	2.23514	1.86124	1.72163	1.42403	1.99907	2.09369	-1.24991	-7.19594	-9.99421	0.427334	0.478336	0.389675	0.34954	0.581927	-0.210406	7.59905	30.2223	52.0832	79.3553	0.233372	1.15524	-0.595477	-0.563596	0.98639	1.15277	3.37491
ZnO uncoated (JRC NM110) 1301a_1000hQUV aged	2	3	-1.07502	0.0229489	-0.641675	-0.47838	-0.581262	0.237756	-2.43589	-8.51945	-17.1029	-22.1906	-1.66568	-0.29005	-1.03627	-0.648096	-0.613845	0.160249	-2.83931	-9.11082	-17.4543	-21.2569	1.20831	0.725942	0.883068	0.906822	0.482757	1.26856	2.26259	-3.72564	-5.73539	-9.14515	1.36275	0.13591	0.183564	0.343941	-0.314043	0.163029	5.52617	19.7208	35.8665	63.9295	1.70349	-0.582841	-0.708123	-0.207087	0.0735742	0.564823	0.505286
ZnO-TECS (JRC NM-111)	1	3	-0.366638	0.441009	-0.873176	-0.345591	-0.217408	-0.128511	0.548994	-3.06628	-21.8837	-22.905	-0.365759	0.145255	-0.772491	-0.377521	-0.106188	0.013518	0.450098	-5.09873	-23.9902	-24.7922	-0.758015	0.641906	-0.366698	-0.681543	0.0917683	0.133037	-0.598636	-1.0271	-13.0202	-11.5915	-0.886968	-0.136119	-1.07579	-0.853822	-0.231115	-0.766666	0.305783	19.6852	49.7363	61.7159	0.427863	0.109903	0.881911	-0.198348	0.295329	0.739736	-0.000705363
ZnO-TECS (JRC NM-111) Nanogenotox protocol	1	3	-0.691871	0.493281	-0.581868	-0.418267	-0.137692	0.414291	-16.2639	-22.7811	-23.4531	-23.1368	-0.769481	0.42551	-0.530224	-0.425936	-0.120577	0.153286	-17.9568	-24.6074	-25.1365	-24.8681	-0.911908	0.0738819	-0.52279	-0.460603	-0.279495	0.296017	-6.7286	-13.5468	-14.7623	-11.8652	-0.763018	-0.578683	-0.596537	-0.704288	-0.909459	1.1466	37.4359	65.3534	84.4142	78.7082	0.131007	0.297419	0.809641	0.35136	0.628	-0.0641288	3.17416
ZnO-TECS (JRC NM111) 2939b_1000hQUV aged	2	3	1.9615	-1.32724	-1.14545	-1.84632	-0.651083	-0.165808	-0.502285	-11.0175	-21.5913	-21.6148	1.70831	-1.64229	-1.35569	-1.26573	-0.643373	0.0708789	-0.456123	-11.4449	-20.7966	-20.7313	0.84734	-0.425006	-0.713695	-1.56149	0.858258	-0.486036	0.362482	-2.10197	-4.63251	-8.01866	-0.129479	-0.325786	-0.102228	-1.27702	0.995147	-0.319434	0.222246	10.9839	23.0793	54.0142	0.60707	-1.39013	-1.36732	1.33616	-0.594897	1.22534	-0.105408
ZnO_SHY-235a (PROM)	2	3	-0.629507	0.301704	0.279378	0.191675	0.378591	-1.095	-7.98784	-20.7897	-24.5634	-24.5819	-0.712792	0.109018	0.0400242	0.191326	0.110443	-1.31346	-8.82894	-20.5775	-23.2955	-23.0047	0.182909	0.510622	0.290856	0.161256	-0.112388	0.426978	-0.533994	-6.53035	-8.01207	-10.4566	0.39288	0.564508	0.493812	0.345258	1.10418	2.31272	13.2206	37.4232	56.6738	56.7726	0.0147903	-0.610265	-1.63655	-0.646077	0.120742	0.934232	3.70028
ZnO_ZnO10 (UoB)	2	3	-1.22359	0.315256	-0.762532	0.376142	0.764051	0.198301	-13.8168	-25.1829	-24.5849	-24.817	-1.22975	0.348845	-0.709748	0.539011	0.627212	0.00147706	-14.1394	-24.0523	-23.3666	-23.271	-0.255666	-0.280179	-0.288102	0.0518591	0.9937	0.116383	-5.49592	-9.13975	-8.80111	-10.3209	0.218247	-0.309618	-1.09015	-0.374681	0.167047	1.28453	16.2382	67.1273	72.9317	121.673	0.254569	-0.20593	-1.01842	0.25764	-0.442385	0.392231	8.74928
ZnO_supernatant_<1% (Water) (PROM)	2	3	-2.00135	-0.86259	-0.748921	-0.153375	-0.639709	-0.691269	-0.208312	-2.66852	0.117116	-0.123588	-2.58404	-1.27027	-1.40759	-0.414249	-0.942269	-1.33973	-0.279666	-2.7964	0.0121726	-0.263992	1.12044	1.36451	0.689956	0.747072	0.440162	0.641409	1.1136	0.775124	1.34456	0.767277	2.34017	1.90657	1.51347	0.975694	1.23558	1.98104	0.192074	1.36905	0.0573055	0.519689	0.969032	0.20691	-0.458512	0.176348	1.35421	0.145923	-0.0196602
ZnO 5 um bulk (Sigma)	2	3	-0.536803	-0.851253	-1.22689	-0.645438	1.49313	-0.00266426	-0.104684	-4.27014	-15.2444	-20.9509	-0.707782	-0.931484	-1.2921	-0.416122	1.27706	0.0205538	-0.0324478	-4.74274	-15.8481	-20.6347	0.571866	-0.0761506	0.247713	0.413963	0.914514	0.447909	0.962414	-0.15958	-3.91814	-8.58174	-0.0743912	0.219087	0.178459	-0.289931	1.14643	0.430868	-0.147997	5.15253	26.7027	71.3105	0.841654	-0.336756	-0.240641	0.814336	0.351775	0.896422	0.934017
SiO2-uncoated (JRC) < 20 nm	1	3	-0.23422	0.194288	-0.730109	-0.626685	-0.278426	-0.773504	0.0687085	0.794481	-0.281579	-0.625991	-0.267984	0.107213	-0.643262	-0.725942	-0.39811	-0.64011	0.122365	1.11904	0.0343817	-0.407352	-0.297823	-0.671676	-0.399657	-0.72512	-0.216451	-0.173763	-0.375345	0.354785	-1.1416	-0.508484	-0.427779	-1.64518	-0.605229	0.0354477	0.136151	-1.45696	-1.02483	-2.17029	-3.80151	-3.91459	-0.596255	-0.74353	0.307188	-0.0208659	0.443036	0.257417	0.170537
SiO2-uncoated (JRC) 25-30 nm	1	3	-0.274276	-1.17922	-1.0406	-1.11277	-0.53188	-0.520521	0.0149577	-0.536545	0.472403	-1.08665	-0.176148	-1.36325	-1.00202	-1.23835	-0.527277	-0.379928	0.0990343	-0.167247	0.886681	-1.1197	-0.226078	-0.0587451	-0.525081	-0.818988	-0.151159	-0.116039	-0.335266	-0.731385	-0.0337937	-0.572983	-1.09433	0.420573	-0.843153	0.0976365	-0.198945	-0.880625	-1.39237	-2.82927	-3.42142	-2.16246	0.128638	0.157658	0.802092	-0.136064	0.44094	0.318887	0.335441
SiO2-uncoated (JRC) 50-60 nm	1	3	-0.386564	-0.599384	-0.467211	-0.636633	0.0814099	-0.91173	-0.490682	0.415725	0.197407	-0.634773	-0.341606	-0.789602	-0.328655	-0.717694	0.0288759	-0.883391	-0.232109	0.80063	0.695242	-0.31817	-0.661962	-1.1539	-0.730003	-0.777003	0.25935	-0.986469	-0.718154	0.419847	-1.74063	-0.755838	-1.49425	-0.977136	-0.904868	-1.17842	-0.721051	-0.947648	-2.04968	-2.86027	-5.29184	-4.95611	-0.0825229	0.119682	0.447761	0.0370402	-0.550003	0.0888011	0.597211
SiO2-uncoated (JRC) 100 nm	1	3	0.153465	-0.253414	-0.198107	0.0200348	0.333261	-0.663012	-0.393369	-0.794744	-1.04464	-1.63877	0.190615	-0.271449	-0.250405	-0.299505	0.404452	-0.604541	-0.32969	-0.538811	-0.763337	-1.53686	-0.865086	-0.235848	-0.449478	-0.547806	0.356959	-0.154607	-1.31733	-0.618271	-1.08431	0.425049	-1.38815	-1.57	-0.251936	-0.176074	-0.629602	-1.04985	-1.79373	-2.48172	-3.74279	-2.00905	-0.207785	-0.0783819	0.787593	0.124912	-0.121638	-0.413781	-0.13972
SiO2-NH2 (JRC) < 20 nm	1	3	-0.77396	-1.91626	-1.05935	-0.356584	-0.63908	0.0224498	-0.140023	-1.50723	-1.85783	-0.19975	-1.18545	-2.28429	-1.30955	-0.754065	-1.23791	-1.02353	-2.09393	-4.84128	-6.82535	-3.67559	-0.825814	-1.1657	-0.810387	-1.2304	-0.235011	-0.698302	-2.18876	-1.8016	0.0929621	0.347289	0.97481	1.14145	1.85883	3.01267	4.74717	6.73739	11.2815	18.7587	28.4172	22.2515	0.0189625	1.04872	0.286071	0.465388	1.23604	0.154931	0.0063043
SiO2-NH2 (JRC) 25-30 nm	1	3	-1.55442	-0.684929	-1.12208	-1.48864	-0.580812	-1.00192	0.29548	0.07391	-1.04872	-1.57348	-1.70616	-0.874979	-1.32879	-1.77533	-0.945674	-1.76005	-0.990326	-0.744775	-2.6337	-3.58971	-1.04476	-0.51208	-0.788656	-1.16591	-0.416669	-0.274447	0.119085	-2.31372	-2.8737	-0.964343	0.012977	0.452996	2.52757	2.56364	4.10178	4.55872	7.97795	5.36448	10.9844	17.3716	0.426112	0.351461	0.675626	1.46193	1.45851	0.867664	0.0507905
SiO2-NH2 (JRC) 50-60 nm	1	3	-1.15407	-0.431704	-1.65949	-1.12976	-1.34809	-1.61958	0.491032	0.0844764	-1.22401	-0.177376	-1.08541	-0.698485	-1.8697	-1.34258	-1.58341	-2.45835	-0.468495	-1.36394	-2.95411	-4.08487	-0.968069	-0.0162999	-1.09286	-1.29606	-0.606533	-1.20936	-0.790069	-1.70004	-2.78884	0.32813	-0.336062	1.31342	1.48161	1.96875	2.90898	5.53484	5.74482	8.92526	14.6196	24.1	1.33883	1.16396	1.98835	1.75924	2.25431	2.2796	1.04957
SiO2-NH2 (JRC) 100 nm	1	3	-0.554521	-0.427591	-1.32779	-0.937011	-0.458497	-0.524111	0.104236	0.107702	-1.24029	-1.79768	-0.760003	-0.702203	-1.22329	-1.0454	-0.786437	-1.18464	-1.08278	-0.756078	-2.64219	-3.63915	-0.831677	-0.593632	-1.28311	-1.15767	-0.258386	-0.579192	-0.37712	-0.956835	-3.04416	-1.40907	0.487342	0.532039	-0.880762	0.898161	3.11075	4.88897	6.86853	6.90498	13.5407	20.7351	0.644256	1.45657	1.46021	0.950597	1.26779	1.40943	0.786872
SiO2-COOH (JRC) < 20 nm	1	3	-0.470074	0.0259349	-0.637726	-0.443272	-0.507994	-0.530534	-0.449221	0.445321	-2.07083	-6.16767	-0.590721	-0.387552	-0.579538	-0.590145	-0.50964	-0.583911	-0.583426	-0.112329	-4.00515	-10.4135	-0.650924	-0.845511	-1.06656	-0.807179	-0.639245	-0.452298	-0.997464	-0.303473	-1.41614	-1.18153	-0.0255429	-0.0161649	-0.95042	-0.332008	-0.434071	-1.15978	1.56252	3.8991	12.5594	34.7124	0.307578	0.393793	0.896618	1.23036	1.01773	0.784871	1.26475
SiO2-COOH (JRC) 25-30 nm	1	3	-1.5559	-1.22593	-0.909867	-1.33642	-0.716873	-1.21687	-1.00176	-0.0172642	-0.560405	-0.115002	-1.83261	-1.42725	-0.959825	-1.52817	-0.686411	-1.14553	-0.996422	0.0791289	-0.44691	-0.146554	-0.874997	-0.727467	-0.80064	0.0899969	-0.325425	-0.532315	-1.41533	-0.230842	-0.719124	0.836959	0.0913486	-0.362169	-1.07741	1.5399	-0.254834	-0.23454	-0.435667	-1.1786	-1.40331	-0.373764	1.33722	0.572125	1.29376	0.0291414	0.702764	1.13416	1.52313
SiO2-COOH (JRC) 50-60 nm	1	3	-0.747095	-3.59563	-1.14103	-1.30166	-1.22369	-0.447464	-0.240671	-1.10391	-0.660114	-0.94089	-0.817786	-3.6967	-1.23421	-1.3863	-1.34273	-0.372583	-0.265477	-0.864171	-0.346609	-0.774355	-1.31718	-1.34779	-1.05182	-1.55471	-0.653411	-0.176758	-0.264901	-0.425692	-0.399933	-0.139626	-1.35431	-0.722589	-0.0411248	-1.06942	-0.0674791	-0.852028	0.545392	-0.384435	-2.19368	-1.73206	0.324901	0.186914	1.37641	0.295103	1.25405	-0.291539	0.397858
SiO2-COOH (JRC) 100 nm	1	3	-1.19382	-1.82019	-1.19411	-0.922828	-1.18773	-0.487227	0.206219	-0.165592	-0.483884	-0.343579	-1.17372	-1.95092	-1.37585	-1.04649	-1.22031	-0.526387	-0.055486	-0.172017	-0.267032	-0.391857	-0.985225	-1.02363	-0.567161	-1.48745	-0.699783	-0.310652	0.0145148	-0.664647	-1.28221	-0.721445	-1.58489	-1.38022	0.607567	-0.65586	-0.0970193	-0.308519	1.35238	-0.271574	-1.4895	0.106244	0.58576	0.984809	1.25015	0.974769	0.92468	0.00906285	0.217366
SiO2 20 nm L-agrinine (pos charged) (JRC-IO153B Silica )	2	3	-1.91712	-0.226923	-0.508264	-0.0381519	-0.927873	-0.433749	-0.956636	-0.918309	-1.43629	-6.68687	-1.97938	-0.144778	-0.880942	0.204466	-1.07584	-0.460403	-0.67903	-0.333297	-0.907669	-6.17255	0.30817	0.613302	0.748377	0.718641	0.82434	0.172369	0.559419	0.735821	0.132616	2.61702	0.496248	-0.618519	0.455871	-0.318964	0.402675	0.0703597	-1.36107	-2.38148	-3.14127	1.38578	1.46539	-0.165785	-1.91851	-0.181603	0.0773388	1.19049	-0.490118
SiO2 20 nm Epoxyde (JRC-IO 113A Silica)	2	3	-1.33167	-0.49027	-1.50562	-1.12761	-0.717515	-0.594996	-1.50885	-0.722649	-2.03446	-3.27463	-1.93122	-1.344	-2.65416	-1.98967	-2.31111	-1.87843	-2.71624	-1.91784	-3.43656	-3.62784	-0.507322	-0.585082	-1.2314	-1.04892	0.104369	-0.849735	-0.230494	0.210452	0.671326	1.37271	1.9816	2.19772	3.918	5.16811	9.47578	9.04314	9.45307	10.0099	9.58377	6.82618	2.1387	-0.71646	-0.651007	0.637632	0.769522	1.44851	1.31414
SiO2 20 nm Methyl (JRC-IO168A Silica)	2	3	-1.22667	-0.48374	-1.99673	0.200204	-0.331696	-0.577862	-0.498407	-0.0447773	-2.70726	-4.31529	-1.12625	-0.623136	-2.06475	0.213148	-0.485815	-0.474153	-0.619064	-0.828438	-4.25357	-6.39506	-0.989454	-1.28358	-1.65811	-0.442615	-0.302819	-0.878563	-0.170993	-0.0390918	0.796427	1.26307	-0.161512	-0.320067	0.214733	-0.185528	0.532837	0.613012	1.43234	2.6055	8.27454	15.8936	0.77525	-0.0165431	-0.495913	-0.570954	0.847883	0.930235	-0.752912
SiO2 20 nm Buthyl (JRC-IO168B Silica)	2	3	-3.08886	-0.317303	-0.561088	-1.22435	-0.173559	-1.37268	-0.677956	-1.47766	-1.74137	-3.59083	-2.74873	-0.527178	-1.01893	-1.18072	-0.372797	-1.36579	-0.799789	-2.01278	-3.15902	-5.19094	-2.01145	-1.18102	-0.977503	-1.80102	-0.993895	-0.807475	-0.646887	-1.08216	0.0130487	0.0183928	-0.652937	0.398649	0.647903	0.431013	1.00453	2.15452	1.38202	3.18038	7.54372	15.7561	1.32346	-0.628439	-1.63223	-0.0244008	0.376878	-0.228066	1.03301
SiO2 20 nm Dodecyl (JRC-IO 168C Silica)	2	3	-1.04489	-0.21269	-0.31173	-0.510905	-0.608102	-1.0392	-1.94562	-1.47781	-4.11895	-4.98591	-0.924687	-0.342298	-0.419646	-0.633184	-0.668438	-1.07391	-2.05145	-2.60856	-5.61057	-6.7422	-1.08229	-0.506544	-0.758234	-1.18041	-0.677055	-0.622188	-0.252995	0.0146871	1.48879	1.13284	-0.691862	0.239633	0.497244	1.51752	0.833168	1.87787	2.02894	6.1347	10.8859	17.7713	0.697081	0.96826	-0.782557	1.18568	1.0312	0.930673	0.982338
SiO2 solvent "N" non funtionalized	3	3	-1.46624	-0.0230032	-0.635168	0.152631	-0.8578	-1.03286	-0.989396	-0.798248	-1.03408	-0.662394	-1.60443	0.326503	-0.776748	-0.373178	-0.789935	-1.14986	-1.17363	-0.530182	-1.16356	-1.40748	-0.736644	0.0115874	-0.191901	-0.177137	-0.55331	-0.397035	-0.0100927	0.17762	0.540591	-0.220316	-1.05192	-0.783393	-0.47571	-0.443164	-1.59878	-0.989361	-0.230055	0.508558	0.162109	0.204538	1.16078	-0.158879	-0.0176495	-0.69827	0.354591	1.03667	0.544083
SiO2 solvent "+" NH2 funtionalized	3	3	-0.880813	-0.700886	-0.652148	-1.32876	-0.611362	-0.112608	-0.863593	-0.386666	-1.47622	-1.13945	-1.09712	-0.871276	-0.928635	-1.14203	-0.773203	-0.226975	-0.782176	-0.584469	-1.44893	-1.63403	0.83625	0.938883	0.394099	0.535497	1.20246	-0.0565385	0.890619	0.551935	1.61637	0.5821	1.10357	0.879025	1.67993	0.234905	1.22595	-0.334077	0.343328	0.929986	1.3589	1.77637	0.749033	0.42483	0.620157	1.2543	0.529198	0.654293	0.834736
SiO2 solvent "- " COOH funtionalized	3	3	-1.55859	-0.734649	-0.837191	-1.42704	-0.503765	-0.799051	-1.23159	0.619316	-1.07897	-0.687775	-1.30866	-1.16491	-0.670225	-1.39255	-0.485711	-0.574103	-1.12358	-0.000609122	-0.922989	-1.02715	-1.08645	-0.616733	-0.437518	-1.15793	-0.744854	-0.245116	-0.558625	-0.372667	0.261136	-1.97094	-1.52597	-0.62048	-1.62516	-1.42785	-1.72289	-1.50046	-1.03501	-0.274929	-0.44296	-0.135246	0.503083	-0.0800259	0.112841	0.862748	-0.0724804	0.25969	0.283933
SiO2 solvent Epoxyde funtionalized	3	3	-1.16946	0.093305	0.537029	-0.581085	-0.583875	-0.824196	-0.551575	-1.06245	-0.543118	-0.392473	-1.08642	0.120122	0.586133	-0.676422	-0.446633	-0.708987	-0.483061	-1.11115	-0.432806	-0.558873	0.29054	0.610732	0.932154	0.117178	0.0253564	0.888084	0.992438	0.737197	1.43259	0.92597	-0.150642	0.0549929	-0.512106	0.284156	-0.484092	0.0700552	0.314	0.729866	0.30755	1.04769	1.26104	0.0395226	-0.72869	0.584119	0.911436	0.817399	0.426715
CuO_CuO10 (UoB)	2	3	-0.240101	-1.39001	-0.457004	-1.07496	-4.19832	-5.57296	-6.38957	-13.3937	-22.7611	-24.3775	-0.234832	-1.57207	-0.714689	-0.986658	-4.10485	-4.85315	-5.79536	-12.4453	-21.9467	-22.8026	0.794956	0.905193	-0.942083	-0.77406	-1.93827	-2.40566	-3.08125	-7.19239	-8.62293	-10.855	0.0157426	0.847832	0.637733	0.643614	1.3405	-0.0754942	2.04469	7.52241	34.5393	62.0503	1.50657	0.157744	1.01561	3.41327	11.2378	14.1807	9.40978
CuO_CuO360 (UoB)	2	3	-0.595078	0.199027	0.795784	-0.738715	-3.53096	-5.36151	-6.12486	-13.8569	-23.3024	-24.4843	-0.697884	0.0152972	0.592916	-0.86968	-3.23555	-4.71158	-5.61055	-13.0045	-22.3664	-23.0307	0.0903113	-0.410535	-0.402613	-0.895233	-1.84942	-3.22042	-3.58863	-7.06389	-8.69705	-10.8498	0.176942	0.298167	0.0592009	1.65692	0.24757	0.475654	3.67541	11.5791	41.1236	84.2237	-0.141631	0.779441	0.467773	3.87816	11.9578	12.6922	9.5625
Fe2O3_SHY-058-a (PROM)	2	3	-1.505	-0.534332	-0.479687	-0.203731	0.247382	-0.213357	-0.816328	-1.43365	-0.39023	-1.3327	-1.63806	-0.719972	-0.60331	-0.085217	-0.342526	-0.321452	-0.781928	-1.31713	-0.4437	-1.29803	-0.89065	-0.709516	-1.07374	-0.622351	-0.280462	-0.547033	-0.699473	-0.864722	-0.703221	-2.08868	0.39124	-0.110127	0.419261	-0.848446	2.1456	0.832821	0.239462	0.357287	0.796371	-0.100034	1.9598	-0.52533	-1.86268	-0.326627	-1.12672	0.648245	0.103622
Hydroxyapatite_Platelets_SHY-229a (PROM)	2	3	-1.07462	0.156249	-0.588034	-0.249134	-0.714267	-3.26502	-10.2637	-12.1646	-14.272	-10.975	-1.03775	-0.0671196	-0.726552	-0.0273742	-1.19728	-4.56771	-13.028	-15.5816	-16.6509	-14.2172	-0.0295611	-0.531217	-0.497532	-0.351547	0.573423	-1.30985	-4.05773	-4.13842	-3.3479	-4.46159	0.173653	0.206613	-0.105489	0.211063	5.03966	12.0119	34.6599	50.7033	45.6049	51.7902	1.17462	-0.719337	-0.760446	1.25223	1.76639	4.13434	6.51635
Hydroxyapatite_Platelets_SHY-229a supernatant(PROM)	3	1	-0.431174	-0.177277	-0.359061	-0.975024	-1.33108	-1.6	-0.425165	0.621972	-1.96808	-2.56601	-0.254269	-0.0582288	-0.185384	-0.858724	-1.17514	-1.21496	-0.447304	0.504977	-2.07488	-2.524	-1.14923	0.327017	0.763968	-0.422367	0.110149	-0.875435	1.0514	-0.199587	-0.206389	-2.38398	-1.45249	-0.638358	-0.513143	-0.817438	-1.81585	-1.69205	0.0916664	0.544329	1.40382	0.0774912	-0.753013	-0.699873	-0.153155	-0.944225	1.52691	0.691287	-0.308399
Hydroxyapatite_LowARods_SHY111-114_a (PROM)	3	3	-1.38653	-0.53155	0.176561	-0.805612	-1.05317	-2.22842	-6.14801	-14.9962	-22.3386	-22.1477	-1.72069	-0.773276	-0.41209	-1.23735	-1.85178	-4.1982	-12.2027	-21.1059	-25.2885	-23.9082	-0.0186509	0.106778	0.290717	0.254793	-0.705376	-0.21987	-1.49115	-1.51428	-1.14339	-1.03819	1.51785	0.632574	1.53166	1.19601	2.72256	9.1959	39.4177	67.8068	74.2379	75.0552	1.58391	0.23012	-0.380726	0.328444	0.0252661	-0.320294	-4.82546
Hydroxyapatite_LowARods_SHY111-114_a Supernatant (PROM)	3	1	-0.689578	0.540846	-3.24357	-0.380094	-2.10028	-2.41427	-0.827794	0.886386	-1.4723	-3.59061			-2.86204	-0.145748	-1.81881	-2.01522	-0.832323	0.909352	-1.53499	-3.66389			-1.44331	-0.817189	-1.26624	-1.86577	-0.315435	-0.619043	-2.43597	-0.767492	-3.63547	-1.41421	-2.26804	-1.64433	-2.59926	-2.0521	1.11512	-0.134192	0.402104	0.424312	-1.23104	-1.01964	2.53541	-0.0981585	2.42078	2.49063	0.252706
Hydroxyapatite_RodsM_PP163a (PROM)	3	3	-0.42654	-0.267632	0.0176937	-0.672294	-0.733221	-1.22213	-2.64289	-6.49265	-13.5275	-13.478	-0.083689	0.546248	0.87608	-0.966517	-0.659272	-1.55594	-4.77898	-14.9326	-21.538	-21.8594	0.429422	0.125757	0.152777	-0.242181	-0.684023	0.215652	-0.68192	-3.29865	-2.93591	-4.58059	-0.479163	-1.14224	-1.47909	-0.24818	-0.659583	0.616929	9.73824	41.4716	70.7398	90.7358	0.363439	0.0839423	-0.556824	0.0476202	0.537557	0.193648	-0.276787
Hydroxyapatite_RodsM_PP163a Supernatant(PROM)	3	1	0.181784	-0.336526	-1.51287	-0.217841	-1.14479	-0.701597	-0.214836	-1.18686	-2.33165	-1.89596	0.317211	-1.00229	-1.4077	-0.186014	-0.874743	-0.250361	-0.254768	-1.06422	-2.2437	-1.92103	-0.389368	-0.773007	0.570816	-0.518392	0.988097	0.0990885	0.479725	2.49946	1.43933	-0.932701	-1.97603	2.05021	-0.551889	-0.946905	-1.91696	-2.32615	0.576459	0.0926115	0.838701	-0.0292955	-1.09367	0.225092	1.70466	-0.527921	0.775986	-0.246673	-0.319073
BaTiO3_SHY-247a (PROM)	2	3	-1.27557	0.156551	0.0255144	-0.107039	-0.0551655	-1.0988	-1.47131	-1.90517	-2.99426	-8.85939	-1.17309	0.109166	-0.0120905	0.236286	-0.151529	-0.937882	-1.3427	-2.07161	-3.40422	-10.647	-0.872956	-0.0938024	-0.268895	-0.396652	-0.542563	-0.00207075	-0.137537	-0.199847	0.731756	0.277463	-0.138029	-0.348152	-0.33119	-0.441159	1.27095	0.864176	0.612925	1.82974	4.78408	28.8247	0.5519	-0.180265	-1.22488	0.075409	0.0771978	0.651892	1.10549
AlOOH_SHY-226-B-a (PROM)	2	3	0.245574	-0.293878	-0.725745	-0.146163	-0.259112	0.131745	-3.52007	-2.28479	-6.82802	-3.11466	-0.177047	-0.685105	-1.00985	-0.485532	-0.563049	0.0538818	-3.45095	-2.4637	-7.1304	-3.83394	0.912398	0.890608	0.911466	0.820279	-0.16019	0.482412	2.90369	2.76803	2.55829	0.810825	0.26561	0.356862	-0.062881	1.35052	0.607161	0.40469	0.587887	2.58155	4.45197	8.11645	1.19665	0.474334	-0.710739	0.879202	-0.0301444	1.14604	-1.26376
Au 12 nm Citrate (JRC-IO166A Gold)	2	3	0.659799	0.378732	-0.673026	-1.31308	0.092268	-0.106886	-0.88675	-1.47841	-0.39982	-1.30418	0.664628	0.15298	-1.09864	-1.06926	-0.0297819	-0.0434172	-0.719211	-1.25433	-0.35088	-0.98831	-0.0819233	-1.05603	-1.24265	-2.58368	-0.930162	-0.828836	0.11648	0.674045	-0.497519	-2.67719	-0.249857	-0.272461	0.151374	-0.884261	-0.133586	-0.492482	-0.226612	0.0198131	0.234221	1.04826	0.435168	-0.488171	-0.829111	-0.366802	0.210707	-0.238538	0.0873226
Au12 nm PEG-OH (JRC-IO166B Gold)	2	3	-1.31198	-1.09573	-1.34406	-0.93074	-0.965789	-1.80248	-0.961304	-1.68003	-0.927759	-1.48299	-1.36583	-1.02153	-1.25744	-0.595464	-0.799814	-1.53917	-0.809997	-1.43781	-0.889946	-1.44115	-0.768766	-0.86042	-1.38333	-1.59395	-0.954414	-0.997259	-0.0447079	0.0422673	0.475283	-0.886626	-0.223658	-0.456904	-0.619055	-0.970545	-0.0263788	0.0312977	-0.487039	0.291484	0.251763	0.337048	1.3623	0.900381	-0.525105	0.209628	1.1974	2.47655	0.739902
Au 12 nm PEG-OH/PEG-Ome (50:50) (JRC-IO166C Gold)	2	3	-1.32718	-0.456452	-0.312397	-0.183692	-0.383561	-0.56845	-1.68304	-1.28594	0.0794807	-0.702393	-1.19384	-0.189997	-0.117505	-0.268055	-0.281586	-0.20804	-1.49711	-0.977047	0.0755053	-0.482288	-0.210414	0.260706	0.376834	0.0584434	0.202959	-0.253219	0.56536	0.0897198	1.37119	-0.447361	0.142953	0.0692131	-0.164568	0.837889	0.313608	0.398051	-0.0396705	-0.492984	0.357899	-0.790655	1.15396	-0.361845	-1.62056	-0.125514	0.870448	2.52877	0.0525856
Au 12 nm PEG-Ome (JRC-IO166D Gold)	2	3	-0.732644	-0.0825068	0.955942	-0.45297	-0.729631	-0.174513	-0.997951	-0.907132	-0.340803	-2.44933	-0.598447	0.09998	0.830523	-0.53233	-0.719663	-0.18754	-0.935674	-0.74771	-0.154836	-2.17716	-1.79047	-0.576582	0.633151	-0.588962	-0.400764	-0.0913689	0.590807	1.44891	2.02625	-0.652263	-0.709854	-0.307079	0.427634	0.209747	0.0609384	0.357264	0.160311	0.242634	-0.412103	-0.494109	-0.273258	0.0612726	-2.15201	0.896721	0.439904	0.773734	0.34327
Au 12 nm PEG-COOH (JRC-IO166E Gold)	2	3	-1.4549	-0.390401	-1.62864	-1.15793	-2.16063	-0.709018	-0.734242	-0.947138	-0.26696	-1.08988	-2.30319	-0.841129	-1.99894	-1.20423	-2.33852	-0.617176	-0.611277	-0.863823	-0.393639	-1.21545	1.26069	1.07112	0.886642	0.926861	0.466848	-0.1055	0.561702	0.176117	1.00003	-1.00906	1.42617	1.04611	0.710092	0.520055	0.292293	-0.471255	-0.714807	-0.227482	0.0246021	-0.726886	1.34818	0.464459	-1.33679	0.844012	0.868551	1.6534	0.760536
[truncated: 95 more columns]
